# Supplementary material
Source: PubMed Central journal article supplement (PMC8447276)
Supplement: 26433230bcd190080-sup-234312_2_supp_6245508_q94g9r.pdf [file 26433230bcd190080-sup-234312_2_supp_6245508_q94g9r.pdf]

**Table S1** CRC constituent candidate TFs

| <u>Kasumi7_CRC</u> | <u>Kasumi9_CRC</u> | <u>NAGL1_CRC</u> | <u>NALM1_CRC</u> |
|--------------------|--------------------|------------------|------------------|
| EGR1               | EGR1               | ERG              | RUNX1            |
| BCL6               | BCL6               | RUNX1            | NFATC1           |
| FOS                | FOS                | IKZF1            | SREBF1           |
| IRF8               | IRF8               | SOX4             | YY1              |
| ERG                | ERG                | MEF2A            | KLF13            |
| RUNX1              | RUNX1              | HIVEP2           | ELF1             |
| NFATC1             | NFATC1             | EBF1             | ETS1             |
| SREBF1             | SREBF1             | MEF2D            | LEF1             |
| SATB1              | SATB1              | PAX5             | MYB              |
| TCF12              | TCF12              | IRF2             | IRF1             |
| IKZF1              | IKZF1              | KLF13            | RARA             |
| YY1                | YY1                | ELF1             | IKZF2            |
| ARID5B             | ARID5B             | ETS1             | FLI1             |
| TCF3               | TCF3               | LEF1             | GATA3            |
| IRF4               | IRF4               | IRF1             | ERF              |
| SOX4               | SOX4               | ETV6             | NR2C2            |
| MEF2A              | MEF2A              | MEF2C            |                  |
| HIVEP2             | HIVEP2             | RUNX3            |                  |
| EBF1               | EBF1               | FLI1             |                  |
| MEF2D              | MEF2D              | SMAD3            |                  |
| PAX5               | PAX5               |                  |                  |
| IRF2               | IRF2               |                  |                  |
| KLF13              | KLF13              |                  |                  |
| ELF1               | ELF1               |                  |                  |
| ETS1               | ETS1               |                  |                  |
| LEF1               | LEF1               |                  |                  |
| MYB                | MYB                |                  |                  |
| IRF1               | NR4A1              |                  |                  |
| ETV6               | ETS2               |                  |                  |
| RARA               | KLF16              |                  |                  |
| TFEB               | SPI1               |                  |                  |
| SREBF2             |                    |                  |                  |
| JUNB               |                    |                  |                  |
| NR3C1              |                    |                  |                  |
| SOX11              |                    |                  |                  |
| MNT                |                    |                  |                  |
| ATF4               |                    |                  |                  |
| IRX2               |                    |                  |                  |
| RELA               |                    |                  |                  |
| HIC2               |                    |                  |                  |
| RFX1               |                    |                  |                  |
| GFI1               |                    |                  |                  |
| ZNF217             |                    |                  |                  |
| MAFK               |                    |                  |                  |
| SPIB               |                    |                  |                  |

**Table S2** Antibodies used in this study

| Antibodies for Western blot      | species | product Nr/clone name | clonality         | Supplier                  |
|----------------------------------|---------|-----------------------|-------------------|---------------------------|
| ERG                              | human   | C-17(sc-354)          | rabbit polyclonal | Santa Cruz Biotechnology  |
| NFATC1                           | human   | A303-508A             | rabbit polyclonal | Bethyl laboratories       |
| RUNX1                            | human   | D33G6(4336)           | rabbit monoclonal | Cell Signaling Technology |
| c-FOS                            | human   | 2250(9F6)             | rabbit monoclonal | Cell Signaling Technology |
| SREBF1                           | human   | 14088-1-AP            | rabbit polyclonal | Proteintech               |
| BCL6                             | human   | 14895S(D412V)         | rabbit monoclonal | Cell Signaling Technology |
| IRF8                             | human   | 5628S(D20D8)          | rabbit monoclonal | Cell Signaling Technology |
| EGR1                             | human   | 4154S(44D5)           | rabbit monoclonal | Cell Signaling Technology |
| PAX5                             | human   | C-20(sc-1974)         | goat polyclonal   | Santa Cruz Biotechnology  |
| GAPDH                            | human   | 14C10(2118S)          | rabbit monoclonal | Cell Signaling Technology |
| SYK                              | human   | A300-559A             | rabbit polyclonal | Bethyl laboratories       |
| Phospho-SYK(Y525/526)            | human   | 2710S(C87C1)          | rabbit monoclonal | Cell Signaling Technology |
| BTK                              | human   | 21581-1-AP            | rabbit polyclonal | Proteintech               |
| Phospho-BTK(Y223)                | human   | 5082S                 | rabbit polyclonal | Cell Signaling Technology |
| MEF2D                            | human   | 0AAB07955             | rabbit polyclonal | Aviva                     |
| p44/42 MAPK(ERK1/2)              | human   | 4695S(137F5)          | rabbit monoclonal | Cell Signaling Technology |
| Phospho-p44/42 MAPK(T202/Y204)   | human   | 4370S(D13.14.4E)      | rabbit monoclonal | Cell Signaling Technology |
| CREB                             | human   | 9197S(48H2)           | rabbit monoclonal | Cell Signaling Technology |
| Phospho CREB(Ser133)             | human   | 9198(87G3)            | rabbit monoclonal | Cell Signaling Technology |
| HA                               |         | ab9110                | rabbit polyclonal | Abcam                     |
| Antibodies for CHIP and ChIP-seq | species | product Nr/clone name | clonality         | Supplier                  |
| HA                               |         | ab9110                | rabbit polyclonal | Abcam                     |
| H3K27Ac                          | human   | ab4729                | rabbit polyclonal | Abcam                     |
| c-FOS                            | human   | 2250(9F6)             | rabbit monoclonal | Cell Signaling Technology |
| SREBF1                           | human   | 14088-1-AP            | rabbit polyclonal | Proteintech               |
| EGR1                             | human   | 4154S(44D5)           | rabbit monoclonal | Cell Signaling Technology |
| CREB                             | human   | 9197S(48H2)           | rabbit monoclonal | Cell Signaling Technology |
| normal rabbit IgG                |         | 2729                  | rabbit polyclonal | Cell Signaling Technology |
| Antibodies for flow cytometry    | species | product Nr            | clone name        | Supplier                  |
| CD8a                             | human   | 301004                | clone RPA-T8      | Biolegend                 |
| CD19                             | human   | 392505                | clone 4G7         | Biolegend                 |
| CD20                             | human   | 560900                | clone 2H7         | BD Pharmingen             |
| CD45                             | human   | 304004                | clone HI30        | Biolegend                 |
| CD179b (lambda5)                 | human   | 349804                | clone HSL11       | Biolegend                 |
| pre-BCR                          | human   | 347904                | clone HSL2        | Biolegend                 |
| Igμ                              | human   | 13-9998-82            | clone SA-DA4      | eBioscience               |
| B220                             | mouse   | 20-0452-U100          | clone RA3-6B2     | TONBO bioscience          |
| CD19                             | mouse   | 12-0193-82            | clone 1D3         | eBioscience               |
| Igμ                              | mouse   | 13-5790-82            | clone II/41       | eBioscience               |
| CD179a (VpreB)                   | mouse   | 143604                | clone R3          | Biolegend                 |
| Pre-B cell Receptor              | mouse   | 551863                | clone SL156       | BD Pharmingen             |
| CD16/CD32                        | mouse   | 70-161-M001           | clone 2.4G2       | TONBO bioscience          |

**Table S3** shRNA targets

| target gene | target sequence         | Ref                                                  |
|-------------|-------------------------|------------------------------------------------------|
| GFP4        | cggcatcaaggtgaacttcaaga | This study                                           |
| GFP6        | GGCACAAGCTGGAGTACAACCT  |                                                      |
| Luciferase  | CTTACGCTGAGTACTTCGA     | Tsuzuki S. Blood. 117:3858-68, 2011                  |
| ERG(1)      | GACTCTTGGGAGGGAGTTA     |                                                      |
| ERG(2)      | CGACATCCTTCTCTCACAT     | Yamamoto K. PLoS One. 30:8(9):e74864, 2013           |
| RUNX1(1)    | CCTCGAAGACATCGGCAGAAA   |                                                      |
| RUNX1(2)    | ACTTTCAGTTCGACTCTCA     | Ying, C. Y. Nat Immunol. 14(10):1084-92, 2013        |
| hBCL6(1)    | CCCATGATGTAGTGCCTCTTT   |                                                      |
| hBCL6(2)    | CCACAGTGACAAAACCTACAA   | Clone ID:NM_002163.1-1388s1c1 Misshon shRNA (Sigma)  |
| hIRF8(1)    | GCCCGCATCATGATTAAGAA    |                                                      |
| hIRF8(2)    | CCATACAAAGTTTACCGAATT   | Clone ID:NM_002163.1-363s1c1 Misshon shRNA (Sigma)   |
| hNFATC1(1)  | CCGCCAACGTTCCAATTAT     | Metzelder SK. Leukemia. 29:1470-7, 2015.             |
| hNFATC1(2)  | CGGATTGAGGTGCAGCCCA     |                                                      |
| hSREBF1(1)  | CCAGAAACTCAAGCAGGAGAA   | Lewis CA. Oncogene. 34(40):5128-40, 2015             |
| hSREBF1(2)  | GCCATCGACTACATTTCGCTTT  |                                                      |
| hFOS(1)     | GCGGAGACAGCAACTAGAA     | Clone ID:NM_005252.2-654s1c1 Misshon shRNA (Sigma)   |
| hFOS(2)     | TCTGCTTTGCAGACCGAGATT   | Clone ID:NM_005252.2-684s1c1 Misshon shRNA (Sigma)   |
| hEGR1(2)    | CGACATCTGTGGAAGAAAGTT   | Clone ID:NM_001964.2-1464s21c1 Misshon shRNA (Sigma) |
| hEGR1(4)    | TACTGGAGTGGAAGGTCTATT   | Clone ID:NM_001964.2-2039s21c1 Misshon shRNA (Sigma) |
| shCREB1(1)  | ACAGCACCCACTAGCACTATT   | Clone ID:NM_004379.2-905s21c1 Misshon shRNA (Sigma)  |
| shCREB1(2)  | ACATTAGCCCAGGTATCTATG   | Clone ID:NM_004379.2-284s21c1 Misshon shRNA (Sigma)  |
| shCD79A/Fw  | GGGGCTTCCTTAGTCATATTC   | Davis RE. Nature 463:88-92, 2010                     |
| shCD79B/Fw  | GCAACTTGGAGGGAGTTCTCT   |                                                      |
| shIgm/Fw    | ACCAGAGAGAGGAACCTCAAAG  | Clone ID:NM_003177.3-889s1c1 Misshon shRNA (Sigma)   |
| shSYK(1)/Fw | GGGCATGAGTGATGGGCTTTA   |                                                      |
| shSYK(2)/Fw | GCAGATGGTTTGTTAAGAGTT   | Davis RE. Nature 463:88-92, 2010                     |
| shBTK(1)/Fw | GGGTGATACGTCATTATGTT    |                                                      |
| shBTK(2)/Fw | GGAGCAAATTTCAATCATTGA   |                                                      |

**Table S4** Chemicals

| inhibitor               | supplier                                | product Nr |
|-------------------------|-----------------------------------------|------------|
| Dasatinib               | Selleck Chemicals                       | S1021      |
| Ibrutinib               | Selleck Chemicals                       | S2680      |
| PRT062607               | Selleck Chemicals                       | S8032      |
| Idelalisib              | Selleck Chemicals                       | S2226      |
| FK506(Tacrolimus)       | FUJIFILM Wako Pure Chemical Cooperation | 063-06071  |
| betulin                 | SIGMA-ALDRICH_MERK                      | B9757      |
| Fatostatin hydrobromide | Selleck Chemicals                       | S8284      |
| FGH10019                | MedChemExpress                          | HY-16207   |
| lipids                  | supplier                                | product Nr |
| cholesterol             | SIGMA-ALDRICH_MERK                      | C3045      |
| 25-hydroxycholesterol   | SIGMA-ALDRICH_MERK                      | H1015      |
| Fatty acid supplement   | SIGMA-ALDRICH_MERK                      | F7050      |

**Table S5** primers for the generation of a dominant-negative MEF2D, RT-PCR, and Crispr-I.

primers to generate a dominant-negative  
MEF2D

|                             |                                                                    |
|-----------------------------|--------------------------------------------------------------------|
| XhoI-MEF2D(1-117)-HA/5sense | TTTTTctcgagCCACCatggggaggaaaaagattcag                              |
| NotI-MEF2D(1-117)-HA/3AS    | tttttGCGGCCGCtcaAGCGTAATCTGGAACATCGTATGGGTAgctact<br>tgtctccagcagg |

RT-PCR primers for MEF2D-HNRNPUL1 (Figure S1C)

|                                                             |                                              |                     |
|-------------------------------------------------------------|----------------------------------------------|---------------------|
| MEF2D-GFP RT-PCR                                            | AGGCAGGAAAGGGGTTAATG<br>GAACTTCAGGGTCAGCTTGC | product size 1292bp |
| HNRNPUL1(not shared<br>with MEF2D-HNRNPUL1 )-GFP RT-<br>PCR | ATAAAGCGAACCGACGAGGA<br>TCACCGGTCCAGGATTCTCT | product size 1039bp |

Crispr-I target sequences (Figure S2)

|         |                      | reference         |
|---------|----------------------|-------------------|
| Ctr-1   | CGCCAAACGTGCCCTGACGG | Gilbert, L. A.    |
| Ctr-2   | AACGACTAGTTAGGCGTGTA | Cell 159:647-661, |
| Ctr-3   | GCTCGGTCCCGCGTCGTCG  | 2014              |
| IGLL1_1 | GAGTCCATGACCGTTACCCC | this study        |
| IGLL1_2 | AACCCAGGGGTAACGGTCA  | this study        |
| IGLL1_3 | CACCTCCCTCTAGGACCGGT | this study        |
| lambda5 | GTGGCTCTGATCTTGCCATA | this study        |

**Table S6**

Primers for ChIP-qPCR and RT-qPCR

| <u>ChIP-pPCR (Figure S1E)</u> |                                                  |
|-------------------------------|--------------------------------------------------|
| GAPDH                         | CCAATTCCCCATCTCAGTCG<br>GTGGGCAGCAGGACACTAGG     |
| IGLL1                         | ACTCATCACTGCCTGGGACT<br>AGGCCTGGACACATCTCAGT     |
| VPREB1                        | CTTCTTTCCCATGCCTGAGT<br>CCGCACCCCAGATAAAATAAA    |
| CD79A                         | CAGGGAAAGGGGAAGAGGAG<br>ATGCTGCTACCCCTAAGTCC     |
| BCL6                          | CCAGCTGGTGTGGTTTTACC<br>CACGGACGAATCGTTATGTGTT   |
| NFATC1                        | GTCTCATAGCCCTGGTGCTC<br>TGCCCTCGTAGGTTTGTT       |
| <u>ChIP-pPCR (Fig. 4D)</u>    |                                                  |
| MEF2Dpromoter_region_1        | AAGGGGTGTGAAATCACGAG<br>CAAGTTTGAGCCCCAGAGAC     |
| MEF2Dpromoter_region_2        | ACAACCTCCCTCTGGGGTCT<br>TCAGTGCTGTGGGTGAGAAG     |
| MEF2Dpromoter_region_3        | GCCTCGGCTGTTGTTGATA<br>CACAGGTGCCTCCCATTG        |
| MEF2Dpromoter_region_4        | CTGAACCGGCAGAGTTGTG<br>AGAGAAGGAGGGGAGGAGCTG     |
| MEF2Dpromoter_region_5        | TGCAAATTAACCGCCTTCTC<br>GCATTCCTTTCTGCTCCAAG     |
| MEF2Dpromoter_region_6        | GGATGTGGGGAAATGTCTTG<br>CCCTGCATTTCTTTTTCTT      |
| <u>ChIP-pPCR (Fig. 4E)</u>    |                                                  |
| GAPDH                         | CCAATTCCCCATCTCAGTCG<br>GTGGGCAGCAGGACACTAGG     |
| SREBF1_1                      | ATCCAGCTCCCTTTGTTTCT<br>CCAGATCACCTGCCTAGCTC     |
| SREBF1_a                      | CTGGTTTTGTCTGGACTGGAG<br>GCCAGGTGTCTGGACTGG      |
| FOS_2                         | CCTGCCGGGTTGGATCTCTA<br>ACCGCAGACCTGCCTCCAG      |
| FOS_b                         | CCCCTTACACAGGATGTCCA<br>CTTGGCGCGTGTCCATATCT     |
| EGR1_3                        | GTGCCAGAGTGGGGTGAC<br>GCCAGAAAGGCAGGAATAG        |
| EGR1_c                        | GGAAAGACACCGTGCCATAG<br>GGGTTCTATCGCTGCATCC      |
| EGR1_d                        | CTCCCGGCTTGGAAACCAG<br>CTTCTCCCTCCTCCCAGAG       |
| EGR1_e                        | CTCTGGGAGGAGGGAAGAAG<br>GCCTCTATTTGAAGGGTCTGG    |
| SREBF1_α                      | GGAGGGAATGACCGTGAGTA<br>GACTCTCCAGCCCTGTGATG     |
| SREBF1_β                      | CACCTTCGATGTCGGTFCAG<br>CCCAGTTTCCGAGGAACTTT     |
| BCL6_4                        | TGCAAACACACACACACACA<br>CGGCATCCCTCAAATCATCG     |
| BCL6_g                        | AAATAATGATCATGAGCAGCGG<br>GCAGTGGTAAAGTCCGAAGC   |
| BCL6_h                        | GAGGTTCCGGTTCGAGGCTC<br>CCTCTCGCTCCCTTTTGTGC     |
| FOS_χ                         | AGGAACTGCCGAAATGCTCAC<br>AGATGCGGTTGGAGTACGAG    |
| EGR1_δ                        | ACAGCACCTCCTCTGGATTC<br>GACGCAGTGAGCACGAACT      |
| EGR1_ε                        | CTGCTCAGTTCGTGCTCACT<br>CTTGTGGTGAGGGGTCACTT     |
| <u>RT-PCR (Fig. 3B)</u>       |                                                  |
| GAPDH                         | GTCTCCTCTGACTTCAACAGCG<br>ACCACCCTGTTGCTGTAGCCAA |
| MEF2D-HNRNPUL1                | AGGCAGGAAAGGGGTTAATG<br>GCTGCAGCTCAATGAACAGA     |
